# Supplementary material for: Natural Killer Cells Do Not Attenuate a Mouse-Adapted SARS-CoV-2-Induced Disease in Rag2−/− Mice
Source: Viruses. 2024 Apr 15;16(4):611. doi: 10.3390/v16040611 (PMC11054502; doi:10.3390/v16040611)
Supplement: Supplementary file 1 [file viruses-16-00611-s001.zip › Supplemental table S1 in EdgeR format.xls]

## Sheet: maverix_diffexp_3-26-2024
gene_id	gene_symbol	description	B6_3DP1_abundance	Rag2_3DP1_abundance	Rag2_3DP1vsB6_3DP1_fold_change	Rag2_3DP1vsB6_3DP1 pVal
619288	Fam71a	family with sequence similarity 71, member A	-	-	7.99862	0.01848
380924	Olfm4	olfactomedin 4	-	-	7.03975	0.0429526
20861	Stfa1	stefin A1	-	-	6.9624	0.00788972
23844	Clca3	chloride channel calcium activated 3	-	-	6.17279	4.59501e-05
104183	Chi3l4	chitinase 3-like 4	-	-	5.94452	0.0334098
11685	Alox12e	arachidonate lipoxygenase, epidermal	-	-	5.06567	0.030938
229672	Bcl2l15	BCLl2-like 15	-	-	4.84532	0.024968
16178	Il1r2	interleukin 1 receptor, type II	-	-	4.79681	0.0135444
18054	Ngp	neutrophilic granule protein	-	-	4.57909	0.0151321
433016	Gm5483	predicted gene 5483	-	-	3.8385	0.0376553
114873	Dscaml1	Down syndrome cell adhesion molecule like 1	-	-	3.38695	0.0279544
170677	Cdhr1	cadherin-related family member 1	-	-	3.18446	0.0200586
245195	Retnlg	resistin like gamma	-	-	3.0088	0.0120346
17833	Muc5ac	mucin 5, subtypes A and C, tracheobronchial/gastric	-	-	3.00378	0.00933963
19695	Reg3g	regenerating islet-derived 3 gamma	-	-	2.99107	0.00333984
20201	S100a8	S100 calcium binding protein A8 (calgranulin A)	-	-	2.91027	0.00550264
26570	Slc7a11	solute carrier family 7 (cationic amino acid transporter, y+ system), member 11	-	-	2.77471	0.00933963
20202	S100a9	S100 calcium binding protein A9 (calgranulin B)	-	-	2.6925	0.0129765
67133	Gp2	glycoprotein 2 (zymogen granule membrane)	-	-	2.49836	0.0401103
14282	Fosb	FBJ osteosarcoma oncogene B	-	-	2.4844	0.013231
16176	Il1b	interleukin 1 beta	-	-	2.26733	0.024968
381823	Apold1	apolipoprotein L domain containing 1	-	-	2.18245	0.0412643
22780	Ikzf3	IKAROS family zinc finger 3	-	-	-1.81479	0.021154
208154	Btla	B and T lymphocyte associated	-	-	-2.02062	0.0365744
100043757	Zfp831	zinc finger protein 831	-	-	-2.34228	0.0135444
214425	Cilp	cartilage intermediate layer protein, nucleotide pyrophosphohydrolase	-	-	-2.35357	0.0462095
76722	Ckmt2	creatine kinase, mitochondrial 2	-	-	-2.61523	0.0491623
58208	Bcl11b	B cell leukemia/lymphoma 11B	-	-	-2.73548	0.00190585
272382	Spib	Spi-B transcription factor (Spi-1/PU.1 related)	-	-	-2.73567	0.00933963
98752	Fcrla	Fc receptor-like A	-	-	-2.79724	0.01848
15002	H2-Ob	histocompatibility 2, O region beta locus	-	-	-2.8138	0.0199338
17068	Ly6d	lymphocyte antigen 6 complex, locus D	-	-	-2.90516	0.0328564
21835	Thrsp	thyroid hormone responsive	-	-	-2.90916	0.00933963
12500	Cd3d	CD3 antigen, delta polypeptide	-	-	-3.419	0.00711016
12290	Cacna1e	calcium channel, voltage-dependent, R type, alpha 1E subunit	-	-	-3.46657	0.0126627
15985	Cd79b	CD79B antigen	-	-	-3.49043	6.5222e-06
12483	Cd22	CD22 antigen	-	-	-3.5164	7.99502e-05
228003	Klhl41	kelch-like 41	-	-	-3.56097	0.0481281
12501	Cd3e	CD3 antigen, epsilon polypeptide	-	-	-3.58987	0.00190585
229499	Fcrl1	Fc receptor-like 1	-	-	-3.91737	0.000453341
12145	Cxcr5	chemokine (C-X-C motif) receptor 5	-	-	-3.96287	0.00235967
12372	Casq1	calsequestrin 1	-	-	-4.00985	0.0353044
210757	Themis	thymocyte selection associated	-	-	-4.08267	0.00335721
233199	Mybpc2	myosin binding protein C, fast-type	-	-	-4.18888	0.0265684
14128	Fcer2a	Fc receptor, IgE, low affinity II, alpha polypeptide	-	-	-4.22329	1.7726e-05
69816	Mzb1	marginal zone B and B1 cell-specific protein 1	-	-	-4.26728	0.024968
12525	Cd8a	CD8 antigen, alpha chain	-	-	-4.34748	5.76651e-08
70192	Cd209g	CD209g antigen	-	-	-4.38407	0.0368864
12715	Ckm	creatine kinase, muscle	-	-	-4.53788	0.00790883
12526	Cd8b1	CD8 antigen, beta chain 1	-	-	-4.82314	3.01868e-07
16069	Igj	immunoglobulin joining chain	-	-	-4.93461	0.021154
242248	Bank1	B cell scaffold protein with ankyrin repeats 1	-	-	-4.96583	8.85331e-07
12507	Cd5	CD5 antigen	-	-	-5.17146	2.81339e-05
72049	Tnfrsf13c	tumor necrosis factor receptor superfamily, member 13c	-	-	-5.21719	0.00173004
239556	Cacna1i	calcium channel, voltage-dependent, alpha 1I subunit	-	-	-5.22812	3.3015e-06
11474	Actn3	actinin alpha 3	-	-	-5.36285	0.0151321
12511	Cd6	CD6 antigen	-	-	-5.64168	8.85331e-07
18507	Pax5	paired box gene 5	-	-	-5.77203	7.99502e-05
17996	Neb	nebulin	-	-	-5.8691	0.0151321
20190	Ryr1	ryanodine receptor 1, skeletal muscle	-	-	-5.88782	0.0395528
21953	Tnni2	troponin I, skeletal, fast 2	-	-	-6.17374	0.0184859
14955	H19	H19 fetal liver mRNA	-	-	-6.48075	0.00933963
17907	Mylpf	myosin light chain, phosphorylatable, fast skeletal muscle	-	-	-6.70764	0.00335721
21957	Tnnt3	troponin T3, skeletal, fast	-	-	-6.81042	0.00190585
69169	Faim3	Fas apoptotic inhibitory molecule 3	-	-	-7.11622	2.11951e-10
18985	Pou2af1	POU domain, class 2, associating factor 1	-	-	-7.47998	2.24051e-13
12143	Blk	B lymphoid kinase	-	-	-7.49616	3.7378e-10
12482	Ms4a1	membrane-spanning 4-domains, subfamily A, member 1	-	-	-7.6611	1.57561e-13
12518	Cd79a	CD79A antigen (immunoglobulin-associated alpha)	-	-	-7.69855	2.20909e-12
19293	Pvalb	parvalbumin	-	-	-7.78256	0.00453019
12902	Cr2	complement receptor 2	-	-	-7.90161	3.12288e-13
11937	Atp2a1	ATPase, Ca++ transporting, cardiac muscle, fast twitch 1	-	-	-7.93877	0.000504611
11459	Acta1	actin, alpha 1, skeletal muscle	-	-	-8.05315	0.0129765
58916	Myot	myotilin	-	-	-8.4494	0.021154
21925	Tnnc2	troponin C2, fast	-	-	-8.85901	0.00173004
109272	Mybpc1	myosin binding protein C, slow-type	-	-	-9.8333	0.0151321
68170	B230118H07Rik	RIKEN cDNA B230118H07 gene	-	-	-10.1407	3.34312e-17
12478	Cd19	CD19 antigen	-	-	-10.8986	1.46951e-16
17884	Myh4	myosin, heavy polypeptide 4, skeletal muscle	-	-	-11.6524	2.41458e-05
17882	Myh2	myosin, heavy polypeptide 2, skeletal muscle, adult	-	-	-12.0282	0.00108563
17879	Myh1	myosin, heavy polypeptide 1, skeletal muscle, adult	-	-	-12.1201	0.00432027
