# Supplementary material for: Natural Killer Cells Do Not Attenuate a Mouse-Adapted SARS-CoV-2-Induced Disease in Rag2−/− Mice
Source: Viruses. 2024 Apr 15;16(4):611. doi: 10.3390/v16040611 (PMC11054502; doi:10.3390/v16040611)
Supplement: Supplementary file 1 [file viruses-16-00611-s001.zip › Supplemental table S2 in Cuffdiff format.xls]

## Sheet: maverix_diffexp_3-26-2024 (1)
gene_id	gene_symbol	description	B6_3DP1_abundance	Rag2_3DP1_abundance	Rag2_3DP1vsB6_3DP1_fold_change	Rag2_3DP1vsB6_3DP1 pVal
23844	Clca3	chloride channel calcium activated 3	0.720793	52.2055	6.17847	0.00426779
16178	Il1r2	interleukin 1 receptor, type II	2.49902	66.1819	4.727	0.00426779
18054	Ngp	neutrophilic granule protein	0.513452	12.1716	4.56714	0.0235814
13874	Ereg	epiregulin	0.805438	11.0307	3.77561	0.00426779
14411	Slc6a12	solute carrier family 6 (neurotransmitter transporter, betaine/GABA), member 12	0.167133	1.87082	3.4846	0.0484847
14825	Cxcl1	chemokine (C-X-C motif) ligand 1	8.10484	89.0594	3.45791	0.00426779
245126	Tarm1	T cell-interacting, activating receptor on myeloid cells 1	0.908044	9.94045	3.45248	0.0459392
268885	Stfa2l1	stefin A2 like 1	3.76568	39.9652	3.40776	0.00426779
20310	Cxcl2	chemokine (C-X-C motif) ligand 2	1.25511	13.195	3.39411	0.0252454
16193	Il6	interleukin 6	8.01383	74.2975	3.21275	0.00426779
20311	Cxcl5	chemokine (C-X-C motif) ligand 5	1.16433	10.7741	3.20999	0.0356744
17833	Muc5ac	mucin 5, subtypes A and C, tracheobronchial/gastric	0.256912	2.11478	3.04116	0.00426779
69097	Trim15	tripartite motif-containing 15	0.506421	4.1243	3.02574	0.0112808
245195	Retnlg	resistin like gamma	17.1574	139.091	3.01913	0.00426779
19695	Reg3g	regenerating islet-derived 3 gamma	51.3358	413.818	3.01096	0.00426779
12310	Calca	calcitonin/calcitonin-related polypeptide, alpha	1.23894	9.37127	2.91914	0.0141249
20201	S100a8	S100 calcium binding protein A8 (calgranulin A)	96.5748	727.109	2.91245	0.00426779
15930	Ido1	indoleamine 2,3-dioxygenase 1	3.85431	27.2559	2.82202	0.00426779
26570	Slc7a11	solute carrier family 7 (cationic amino acid transporter, y+ system), member 11	0.52396	3.68365	2.81361	0.00426779
21789	Tfpi2	tissue factor pathway inhibitor 2	2.84168	19.7944	2.80028	0.00426779
17750	Mt2	metallothionein 2	92.9022	637.899	2.77954	0.00426779
20202	S100a9	S100 calcium binding protein A9 (calgranulin B)	74.7896	490.987	2.71478	0.00426779
56847	Aldh1a3	aldehyde dehydrogenase family 1, subfamily A3	0.8974	5.83092	2.6999	0.00426779
13371	Dio2	deiodinase, iodothyronine, type II	1.8856	11.9996	2.66989	0.00426779
20296	Ccl2	chemokine (C-C motif) ligand 2	74.3795	472.332	2.66682	0.00426779
12642	Ch25h	cholesterol 25-hydroxylase	16.7896	102.992	2.6169	0.00426779
72780	Rspo3	R-spondin 3 homolog (Xenopus laevis)	0.691728	4.17466	2.59338	0.00777263
16878	Lif	leukemia inhibitory factor	2.98382	17.8427	2.5801	0.00426779
19734	Rgs16	regulator of G-protein signaling 16	1.4127	8.44622	2.57985	0.00426779
228765	Sdcbp2	syndecan binding protein (syntenin) 2	1.78949	10.6474	2.57288	0.00426779
14282	Fosb	FBJ osteosarcoma oncogene B	2.17663	12.649	2.53886	0.00426779
67133	Gp2	glycoprotein 2 (zymogen granule membrane)	0.961613	5.5706	2.5343	0.0189723
258783	Olfr920	olfactory receptor 920	0.724704	4.13158	2.51123	0.0141249
12945	Dmbt1	deleted in malignant brain tumors 1	0.193717	1.09722	2.50184	0.0189723
225594	Gm4841	predicted gene 4841	5.23625	29.3932	2.48888	0.00426779
18787	Serpine1	serine (or cysteine) peptidase inhibitor, clade E, member 1	24.5089	136.171	2.47404	0.00426779
240913	Adamts4	a disintegrin-like and metallopeptidase (reprolysin type) with thrombospondin type 1 motif, 4	2.74304	15.0502	2.45594	0.00426779
60533	Cd274	CD274 antigen	37.6696	205.543	2.44796	0.0141249
13003	Vcan	versican	17.2379	93.2747	2.4359	0.00426779
68891	Cd177	CD177 antigen	4.34736	22.922	2.39852	0.00426779
17329	Cxcl9	chemokine (C-X-C motif) ligand 9	17.1853	90.0883	2.39016	0.00426779
433470	AA467197	expressed sequence AA467197	19.5334	101.402	2.37608	0.00426779
381845	2310014L17Rik	RIKEN cDNA 2310014L17 gene	1.59006	8.19312	2.36533	0.00426779
14313	Fst	follistatin	3.4475	17.7037	2.36043	0.00426779
94227	Pi15	peptidase inhibitor 15	8.05366	40.6419	2.33525	0.00426779
213002	Ifitm6	interferon induced transmembrane protein 6	10.9196	54.3204	2.31457	0.00426779
14344	Fut2	fucosyltransferase 2	0.369965	1.83376	2.30935	0.0141249
12768	Ccr1	chemokine (C-C motif) receptor 1	16.6151	82.1398	2.30558	0.00426779
270152	Amica1	adhesion molecule, interacts with CXADR antigen 1	5.16059	25.118	2.28312	0.00426779
16176	Il1b	interleukin 1 beta	10.7191	52.041	2.27947	0.00426779
13349	Darc	Duffy blood group, chemokine receptor	3.08805	14.5928	2.24049	0.0235814
14066	F3	coagulation factor III	63.7861	296.679	2.21759	0.0189723
246746	Cd300lf	CD300 antigen like family member F	10.0228	46.5769	2.21633	0.00426779
11839	Areg	amphiregulin	10.5283	48.6765	2.20895	0.00426779
381823	Apold1	apolipoprotein L domain containing 1	2.075	9.55635	2.20335	0.00426779
17002	Ltf	lactotransferrin	31.9227	146.493	2.19818	0.00426779
20339	Sele	selectin, endothelial cell	1.82437	8.33277	2.1914	0.00777263
213980	Fbxw10	F-box and WD-40 domain protein 10	0.617451	2.80177	2.18194	0.0168847
23795	Agr2	anterior gradient 2	3.29847	14.6848	2.15446	0.0371343
16995	Ltb4r1	leukotriene B4 receptor 1	1.14236	5.08267	2.15356	0.0402247
11846	Arg1	arginase, liver	8.24716	36.5159	2.14656	0.00426779
17748	Mt1	metallothionein 1	149.114	658.583	2.14295	0.00426779
20306	Ccl7	chemokine (C-C motif) ligand 7	51.3807	224.8	2.12935	0.00777263
12765	Cxcr2	chemokine (C-X-C motif) receptor 2	3.36714	14.0705	2.06308	0.00426779
241452	Dhrs9	dehydrogenase/reductase (SDR family) member 9	1.46255	6.1035	2.06115	0.00426779
18413	Osm	oncostatin M	1.52505	6.33212	2.05384	0.0371343
66107	1100001G20Rik	RIKEN cDNA 1100001G20 gene	7.34424	30.0306	2.03175	0.0252454
57262	Retnla	resistin like alpha	192.965	779.52	2.01424	0.00777263
55948	Sfn	stratifin	14.0652	56.2928	2.00082	0.00426779
15466	Hrh2	histamine receptor H2	1.64101	6.51193	1.9885	0.0416003
215384	Fcgbp	Fc fragment of IgG binding protein	0.858555	3.40297	1.98681	0.00426779
50930	Tnfsf14	tumor necrosis factor (ligand) superfamily, member 14	1.36966	5.34792	1.96516	0.0141249
12740	Cldn4	claudin 4	3.84428	14.9772	1.96198	0.00777263
20555	Slfn1	schlafen 1	28.9906	112.265	1.95325	0.0112808
223881	Rnd1	Rho family GTPase 1	5.93289	22.9087	1.94909	0.00426779
215446	Entpd3	ectonucleoside triphosphate diphosphohydrolase 3	1.07665	4.13528	1.94143	0.0168847
75234	Rnf19b	ring finger protein 19B	27.0736	103.271	1.93148	0.00426779
18791	Plat	plasminogen activator, tissue	38.6733	147.273	1.92908	0.00426779
16365	Irg1	immunoresponsive gene 1	7.90949	29.9363	1.92024	0.0402247
64292	Ptges	prostaglandin E synthase	13.9568	52.6763	1.91618	0.00426779
260315	Nav3	neuron navigator 3	0.921924	3.47822	1.91563	0.00777263
57814	Kcne4	potassium voltage-gated channel, Isk-related subfamily, gene 4	6.05903	22.4111	1.88705	0.00426779
20698	Sphk1	sphingosine kinase 1	12.8863	47.6434	1.88644	0.00426779
12489	Cd33	CD33 antigen	5.05586	18.4565	1.8681	0.00426779
378425	Nlrp12	NLR family, pyrin domain containing 12	0.732127	2.67071	1.86706	0.0371343
21822	Tgtp1	T cell specific GTPase 1	29.627	107.274	1.85632	0.0443089
11535	Adm	adrenomedullin	8.44195	30.5472	1.85539	0.0141249
14727	Gp49a	glycoprotein 49 A	18.0778	65.3222	1.85336	0.00777263
11910	Atf3	activating transcription factor 3	15.9496	57.4299	1.84828	0.00426779
15117	Has2	hyaluronan synthase 2	0.630393	2.26636	1.84606	0.0315011
17869	Myc	myelocytomatosis oncogene	6.64112	23.8073	1.84191	0.00426779
13803	Enc1	ectodermal-neural cortex 1	11.2319	40.1906	1.83926	0.00426779
58217	Trem1	triggering receptor expressed on myeloid cells 1	2.25156	7.95523	1.82098	0.00426779
211550	Tifa	TRAF-interacting protein with forkhead-associated domain	9.56805	33.4793	1.80697	0.00426779
15368	Hmox1	heme oxygenase (decycling) 1	20.2984	70.8946	1.80431	0.00426779
18793	Plaur	plasminogen activator, urokinase receptor	29.0743	100.524	1.78973	0.00426779
21816	Tgm1	transglutaminase 1, K polypeptide	3.39907	11.737	1.78785	0.0112808
14544	Gda	guanine deaminase	21.2401	72.8457	1.77806	0.0235814
100034251	Wfdc17	WAP four-disulfide core domain 17	37.4323	128.295	1.77711	0.0168847
100042498	Mir22hg	Mir22 host gene (non-protein coding)	13.963	47.1972	1.75709	0.00426779
16633	Klra2	killer cell lectin-like receptor, subfamily A, member 2	16.7548	56.613	1.75656	0.00426779
18768	Pkib	protein kinase inhibitor beta, cAMP dependent, testis specific	1.1462	3.86752	1.75455	0.00777263
74748	Slamf8	SLAM family member 8	2.4778	8.28331	1.74114	0.029545
14058	F10	coagulation factor X	5.26422	17.5597	1.73798	0.00426779
17394	Mmp8	matrix metallopeptidase 8	9.7293	32.3946	1.73534	0.0387819
620695	Gm13889	predicted gene 13889	21.0858	70.1317	1.7338	0.00426779
54483	Mefv	Mediterranean fever	3.22082	10.692	1.73104	0.0141249
232400	BC048546	cDNA sequence BC048546	5.06411	16.8088	1.73084	0.00426779
12703	Socs1	suppressor of cytokine signaling 1	5.02911	16.608	1.7235	0.0499868
244152	Tsku	tsukushi	8.72986	28.7628	1.72018	0.00426779
634650	Gbp11	guanylate binding protein 11	3.7632	12.3164	1.71054	0.0402247
74145	F13a1	coagulation factor XIII, A1 subunit	16.3407	53.4042	1.70848	0.00426779
18030	Nfil3	nuclear factor, interleukin 3, regulated	6.9206	22.5767	1.70587	0.00426779
74424	Tmc5	transmembrane channel-like gene family 5	1.77091	5.76909	1.70385	0.0189723
22040	Trex1	three prime repair exonuclease 1	33.3403	108.49	1.70223	0.00777263
22402	Wisp1	WNT1 inducible signaling pathway protein 1	4.05192	13.1848	1.7022	0.00426779
16174	Il18rap	interleukin 18 receptor accessory protein	5.19447	16.8552	1.69815	0.00426779
20717	Serpina3m	serine (or cysteine) peptidase inhibitor, clade A, member 3M	19.2809	61.9532	1.684	0.0213577
12044	Bcl2a1a	B cell leukemia/lymphoma 2 related protein A1a	7.83548	25.1195	1.68072	0.0252454
20525	Slc2a1	solute carrier family 2 (facilitated glucose transporter), member 1	10.1023	32.2972	1.67672	0.00426779
21942	Tnfrsf9	tumor necrosis factor receptor superfamily, member 9	2.14388	6.8493	1.67573	0.0484847
12045	Bcl2a1b	B cell leukemia/lymphoma 2 related protein A1b	21.1415	67.4807	1.6744	0.00426779
57266	Cxcl14	chemokine (C-X-C motif) ligand 14	41.6469	131.692	1.66089	0.00777263
12519	Cd80	CD80 antigen	3.14617	9.89368	1.65291	0.0443089
14728	Lilrb4	leukocyte immunoglobulin-like receptor, subfamily B, member 4	46.2318	144.449	1.64361	0.0189723
215418	Csrnp1	cysteine-serine-rich nuclear protein 1	17.6315	54.8473	1.63727	0.00426779
100038947	LOC100038947	signal-regulatory protein beta 1-like	8.93644	27.4364	1.61832	0.0213577
18712	Pim1	proviral integration site 1	25.1913	76.6337	1.60506	0.00426779
631323	Gm12250	predicted gene 12250	33.4012	101.564	1.60441	0.0402247
12363	Casp4	caspase 4, apoptosis-related cysteine peptidase	23.4652	71.0583	1.59848	0.0141249
14130	Fcgr2b	Fc receptor, IgG, low affinity IIb	34.0638	102.645	1.59135	0.00426779
18654	Pgf	placental growth factor	5.21161	15.6687	1.58808	0.0416003
21928	Tnfaip2	tumor necrosis factor, alpha-induced protein 2	18.5598	55.7559	1.58694	0.00426779
107350	AW112010	expressed sequence AW112010	93.9291	281.352	1.58273	0.0315011
209601	4922501L14Rik	RIKEN cDNA 4922501L14 gene	3.42122	10.2207	1.57891	0.0371343
22271	Upp1	uridine phosphorylase 1	11.0072	32.637	1.56805	0.0252454
74568	Mlkl	mixed lineage kinase domain-like	19.5166	57.8504	1.56763	0.029545
56619	Clec4e	C-type lectin domain family 4, member e	5.4259	15.8258	1.54434	0.0189723
328561	Apol10b	apolipoprotein L 10B	9.1036	26.3958	1.5358	0.0252454
328967	Arhgef37	Rho guanine nucleotide exchange factor (GEF) 37	2.54238	7.35423	1.53239	0.0459392
99382	Abtb2	ankyrin repeat and BTB (POZ) domain containing 2	3.05095	8.81503	1.53071	0.0168847
12047	Bcl2a1d	B cell leukemia/lymphoma 2 related protein A1d	10.9296	31.5423	1.52905	0.0337442
21929	Tnfaip3	tumor necrosis factor, alpha-induced protein 3	13.9028	40.0015	1.52468	0.0213577
15361	Hmga1	high mobility group AT-hook 1	15.2662	43.8915	1.5236	0.0484847
74481	Batf2	basic leucine zipper transcription factor, ATF-like 2	8.61309	24.5655	1.51203	0.0213577
16169	Il15ra	interleukin 15 receptor, alpha chain	10.555	29.9946	1.50678	0.0429135
14782	Gsr	glutathione reductase	36.198	102.067	1.49553	0.0235814
20539	Slc7a5	solute carrier family 7 (cationic amino acid transporter, y+ system), member 5	2.70831	7.63472	1.49518	0.0387819
16975	Lrp8	low density lipoprotein receptor-related protein 8, apolipoprotein e receptor	0.875359	2.46061	1.49107	0.0387819
279572	Tlr13	toll-like receptor 13	16.2384	45.5129	1.48687	0.0499868
14776	Gpx2	glutathione peroxidase 2	14.0079	38.9321	1.47472	0.00777263
14131	Fcgr3	Fc receptor, IgG, low affinity III	44.9759	124.535	1.46933	0.0276052
93692	Glrx	glutaredoxin	15.9256	43.9676	1.46509	0.00426779
56644	Clec7a	C-type lectin domain family 7, member a	29.8352	81.9033	1.45691	0.00426779
14289	Fpr2	formyl peptide receptor 2	7.81241	21.4419	1.45659	0.0387819
19225	Ptgs2	prostaglandin-endoperoxide synthase 2	7.94819	21.6905	1.44836	0.00426779
16668	Krt18	keratin 18	102.421	277.913	1.44013	0.0443089
16007	Cyr61	cysteine rich protein 61	61.4581	166.196	1.43521	0.00426779
71982	Snx10	sorting nexin 10	21.4844	58.0075	1.43295	0.0252454
14281	Fos	FBJ osteosarcoma oncogene	31.8174	85.5291	1.4266	0.00426779
13654	Egr2	early growth response 2	7.85855	21.0242	1.41972	0.0168847
76074	Gbp8	guanylate-binding protein 8	8.56519	22.8215	1.41384	0.0235814
12778	Ackr3	atypical chemokine receptor 3	28.0405	74.1169	1.40229	0.0168847
22146	Tuba1c	tubulin, alpha 1C	13.9062	36.3973	1.3881	0.00426779
18703	Pigr	polymeric immunoglobulin receptor	17.5446	45.7092	1.38146	0.00426779
16402	Itga5	integrin alpha 5 (fibronectin receptor alpha)	16.8974	43.9734	1.37983	0.0443089
239743	Klhl6	kelch-like 6	12.9824	33.5395	1.36931	0.0189723
11501	Adam8	a disintegrin and metallopeptidase domain 8	12.125	31.2344	1.36516	0.0168847
67702	Rnf149	ring finger protein 149	20.4404	52.4947	1.36075	0.0168847
12362	Casp1	caspase 1	11.2627	28.9148	1.36025	0.029545
18263	Odc1	ornithine decarboxylase, structural 1	37.0991	95.0174	1.35681	0.029545
13014	Cstb	cystatin B	83.1739	212.403	1.3526	0.0189723
13024	Ctla2a	cytotoxic T lymphocyte-associated protein 2 alpha	101.555	259.032	1.35087	0.0429135
17392	Mmp3	matrix metallopeptidase 3	33.3996	85.0708	1.34883	0.0402247
12952	Cry1	cryptochrome 1 (photolyase-like)	4.82249	12.2172	1.34106	0.0252454
100608	Noc4l	nucleolar complex associated 4 homolog (S. cerevisiae)	5.00226	12.6047	1.33331	0.0459392
382062	AB124611	cDNA sequence AB124611	13.5149	33.8645	1.32522	0.0499868
328833	Treml2	triggering receptor expressed on myeloid cells-like 2	2.99181	7.47046	1.32018	0.0371343
11853	Rhoc	ras homolog gene family, member C	90.0738	224.905	1.32013	0.029545
214855	Arid5a	AT rich interactive domain 5A (MRF1-like)	7.02932	17.4637	1.3129	0.0252454
74732	Stx11	syntaxin 11	13.7874	34.051	1.30435	0.0213577
18574	Pde1b	phosphodiesterase 1B, Ca2+-calmodulin dependent	3.56625	8.80001	1.3031	0.0429135
74442	Sgms2	sphingomyelin synthase 2	4.29014	10.5711	1.30103	0.00426779
16164	Il13ra1	interleukin 13 receptor, alpha 1	30.7374	74.7724	1.28251	0.0429135
19277	Ptpro	protein tyrosine phosphatase, receptor type, O	3.43179	8.3393	1.28097	0.0356744
11690	Alox5ap	arachidonate 5-lipoxygenase activating protein	53.8541	130.783	1.28005	0.0371343
56320	Dbn1	drebrin 1	4.59401	11.143	1.27832	0.0473817
72504	Taf4b	TAF4B RNA polymerase II, TATA box binding protein (TBP)-associated factor	2.57462	6.20267	1.26853	0.0276052
70701	Nipal1	NIPA-like domain containing 1	2.47014	5.92663	1.26262	0.0387819
20198	S100a4	S100 calcium binding protein A4	105.493	251.705	1.25459	0.029545
69863	Ttc39b	tetratricopeptide repeat domain 39B	12.6503	30.1485	1.25291	0.0416003
67951	Tubb6	tubulin, beta 6 class V	20.8018	49.205	1.2421	0.0276052
71839	Osgin1	oxidative stress induced growth inhibitor 1	5.98474	14.0944	1.23576	0.0402247
74194	Rnd3	Rho family GTPase 3	18.188	42.495	1.22431	0.0416003
15114	Hap1	huntingtin-associated protein 1	6.57659	15.3591	1.22368	0.0416003
17395	Mmp9	matrix metallopeptidase 9	3.88107	8.99333	1.2124	0.0459392
17133	Maff	v-maf musculoaponeurotic fibrosarcoma oncogene family, protein F (avian)	14.0481	32.209	1.19709	0.0315011
17872	Ppp1r15a	protein phosphatase 1, regulatory (inhibitor) subunit 15A	18.1477	41.1264	1.18027	0.0356744
212632	Iffo2	intermediate filament family orphan 2	6.17198	13.7028	1.15067	0.0484847
18442	P2ry2	purinergic receptor P2Y, G-protein coupled 2	6.06121	13.3544	1.13963	0.0484847
12983	Csf2rb	colony stimulating factor 2 receptor, beta, low-affinity (granulocyte-macrophage)	13.7245	29.9227	1.12448	0.0484847
207839	Galnt6	UDP-N-acetyl-alpha-D-galactosamine:polypeptide N-acetylgalactosaminyltransferase 6	3.13202	6.81489	1.1216	0.0429135
12478	Cd19	CD19 antigen	9.6132	0	0	0.00426779
17878	Myf6	myogenic factor 6	1.80206	0	0	0.00426779
20861	Stfa1	stefin A1	0	5.69094	0	0.00426779
20862	Stfa2	stefin A2	0	4.10358	0	0.00426779
68170	B230118H07Rik	RIKEN cDNA B230118H07 gene	6.05584	0	0	0.00426779
215031	Vgll2	vestigial like 2 homolog (Drosophila)	1.3495	0	0	0.00426779
219033	Ang4	angiogenin, ribonuclease A family, member 4	0	1.15294	0	0.0443089
380924	Olfm4	olfactomedin 4	0	0.974889	0	0.00426779
619288	Fam71a	family with sequence similarity 71, member A	0	1.42993	0	0.00426779
100034684	BC100530	cDNA sequence BC100530	0	1.33501	0	0.0315011
12842	Col1a1	collagen, type I, alpha 1	39.8996	18.4226	-1.1149	0.0473817
20928	Abcc9	ATP-binding cassette, sub-family C (CFTR/MRP), member 9	7.01177	2.93905	-1.25443	0.0416003
59006	Myoz2	myozenin 2	29.0999	12.1288	-1.26258	0.0443089
58909	Fam13a	family with sequence similarity 13, member A	16.9637	7.00831	-1.27531	0.0213577
68655	Fndc1	fibronectin type III domain containing 1	6.57963	2.7152	-1.27694	0.0356744
29811	Ndrg2	N-myc downstream regulated gene 2	55.3954	22.4101	-1.30562	0.0141249
12819	Col15a1	collagen, type XV, alpha 1	5.90902	2.35355	-1.32808	0.0252454
67731	Fbxo32	F-box protein 32	13.476	5.33132	-1.33783	0.0429135
12818	Col14a1	collagen, type XIV, alpha 1	14.9138	5.74885	-1.37531	0.0429135
66277	Klf15	Kruppel-like factor 15	19.4274	7.48657	-1.37572	0.0189723
108995	Tbc1d10c	TBC1 domain family, member 10c	8.71716	3.22913	-1.43271	0.0387819
106393	Srl	sarcalumenin	16.3366	6.04289	-1.4348	0.00426779
20741	Sptb	spectrin beta, erythrocytic	2.61372	0.952663	-1.45607	0.0473817
100705	Acacb	acetyl-Coenzyme A carboxylase beta	10.5536	3.83651	-1.45987	0.0337442
17929	Myom1	myomesin 1	29.215	10.4372	-1.48497	0.0371343
14451	Gas1	growth arrest specific 1	8.92691	3.1457	-1.50478	0.0315011
234564	Ces1f	carboxylesterase 1F	11.1686	3.87433	-1.52743	0.0484847
11472	Actn2	actinin alpha 2	19.575	6.66884	-1.5535	0.00777263
74166	Tmem38a	transmembrane protein 38A	16.9598	5.70064	-1.57292	0.00426779
98660	Atp1a2	ATPase, Na+/K+ transporting, alpha 2 polypeptide	40.1669	13.3811	-1.58581	0.0252454
13808	Eno3	enolase 3, beta muscle	33.1946	10.6926	-1.63433	0.00777263
12180	Smyd1	SET and MYND domain containing 1	5.73193	1.82752	-1.64914	0.0235814
20528	Slc2a4	solute carrier family 2 (facilitated glucose transporter), member 4	8.76356	2.77302	-1.66006	0.0213577
53318	Pdlim3	PDZ and LIM domain 3	16.5193	5.22199	-1.66148	0.00777263
11754	Aoc3	amine oxidase, copper containing 3	3.95871	1.1902	-1.73382	0.0276052
12862	Cox6a2	cytochrome c oxidase subunit VIa polypeptide 2	57.5834	17.2907	-1.73566	0.00777263
17167	Marco	macrophage receptor with collagenous structure	9.08124	2.68915	-1.75574	0.0168847
74183	2310042D19Rik	RIKEN cDNA 2310042D19 gene	3.24388	0.924477	-1.81101	0.0356744
22780	Ikzf3	IKAROS family zinc finger 3	9.25827	2.62486	-1.8185	0.00426779
15464	Hrc	histidine rich calcium binding protein	10.2884	2.86484	-1.84449	0.00426779
69585	Hfe2	hemochromatosis type 2 (juvenile) (human homolog)	5.47129	1.51665	-1.85099	0.029545
65256	Asb2	ankyrin repeat and SOCS box-containing 2	7.76023	2.12232	-1.87046	0.0189723
57264	Retn	resistin	31.6596	8.63563	-1.87427	0.0337442
22437	Xirp1	xin actin-binding repeat containing 1	6.20163	1.69139	-1.87444	0.00426779
243912	Hspb6	heat shock protein, alpha-crystallin-related, B6	31.819	8.49047	-1.90597	0.00426779
21393	Tcap	titin-cap	90.6161	24.1214	-1.90946	0.00426779
378431	Txlnb	taxilin beta	11.0741	2.94517	-1.91076	0.00426779
56012	Pgam2	phosphoglycerate mutase 2	22.5029	5.9565	-1.91757	0.0252454
103968	Plin1	perilipin 1	15.0992	3.89907	-1.95327	0.0213577
268859	Rbfox1	RNA binding protein, fox-1 homolog (C. elegans) 1	1.70014	0.435409	-1.96521	0.0499868
12865	Cox7a1	cytochrome c oxidase subunit VIIa 1	68.0553	17.302	-1.97577	0.0235814
13417	Dnah8	dynein, axonemal, heavy chain 8	1.08665	0.275668	-1.97888	0.0112808
208154	Btla	B and T lymphocyte associated	11.6473	2.95374	-1.97938	0.00426779
213439	Gpr174	G protein-coupled receptor 174	2.16491	0.544482	-1.99135	0.0141249
74376	Myo18b	myosin XVIIIb	4.37284	1.08852	-2.0062	0.00426779
24131	Ldb3	LIM domain binding 3	24.8067	6.11373	-2.02061	0.00426779
14133	Fcna	ficolin A	7.59614	1.86093	-2.02924	0.0315011
74249	Lrrc2	leucine rich repeat containing 2	2.38086	0.57677	-2.04541	0.0235814
14077	Fabp3	fatty acid binding protein 3, muscle and heart	151.551	34.066	-2.1534	0.00426779
18788	Serpinb2	serine (or cysteine) peptidase inhibitor, clade B, member 2	5.55613	1.24463	-2.15836	0.0141249
11450	Adipoq	adiponectin, C1Q and collagen domain containing	59.2634	12.9918	-2.18954	0.00426779
381339	Tmem182	transmembrane protein 182	6.44804	1.40957	-2.1936	0.0189723
22229	Ucp3	uncoupling protein 3 (mitochondrial, proton carrier)	4.66081	0.99131	-2.23317	0.00426779
19309	Pygm	muscle glycogen phosphorylase	33.8461	7.19234	-2.23446	0.00426779
93677	Lmod2	leiomodin 2 (cardiac)	14.0262	2.91947	-2.26434	0.00426779
72607	Usp13	ubiquitin specific peptidase 13 (isopeptidase T-3)	6.29086	1.27836	-2.29896	0.00426779
13628	Eef1a2	eukaryotic translation elongation factor 1 alpha 2	17.8551	3.55996	-2.32641	0.00426779
100043757	Zfp831	zinc finger protein 831	1.6816	0.331764	-2.34161	0.00426779
214425	Cilp	cartilage intermediate layer protein, nucleotide pyrophosphohydrolase	4.35341	0.843684	-2.36737	0.00426779
116904	Alpk3	alpha-kinase 3	5.18303	0.97923	-2.40407	0.00426779
399548	Scn4b	sodium channel, type IV, beta	3.07834	0.566882	-2.44103	0.00426779
11870	Art1	ADP-ribosyltransferase 1	8.66962	1.59037	-2.4466	0.0189723
17897	Myl3	myosin, light polypeptide 3	12.1107	2.21757	-2.44923	0.0189723
13850	Ephx2	epoxide hydrolase 2, cytoplasmic	16.2937	2.97256	-2.45454	0.00426779
243958	Siglecg	sialic acid binding Ig-like lectin G	3.28396	0.59165	-2.47262	0.00777263
223513	Abra	actin-binding Rho activating protein	8.94464	1.60921	-2.47467	0.00426779
76469	Cmya5	cardiomyopathy associated 5	21.2486	3.60637	-2.55875	0.00426779
76722	Ckmt2	creatine kinase, mitochondrial 2	61.922	10.2843	-2.59	0.00426779
68802	Mypn	myopalladin	2.91917	0.471359	-2.63066	0.00426779
110880	Scn4a	sodium channel, voltage-gated, type IV, alpha	2.2756	0.360904	-2.65656	0.00426779
100504518	3425401B19Rik	RIKEN cDNA 3425401B19 gene	4.93685	0.782313	-2.65777	0.00426779
380698	Obscn	obscurin, cytoskeletal calmodulin and titin-interacting RhoGEF	9.71557	1.52456	-2.67191	0.00426779
58208	Bcl11b	B cell leukemia/lymphoma 11B	0.95012	0.144198	-2.72005	0.0112808
98752	Fcrla	Fc receptor-like A	4.50762	0.670496	-2.74906	0.00426779
272382	Spib	Spi-B transcription factor (Spi-1/PU.1 related)	5.60895	0.819071	-2.77567	0.00426779
244923	Klhl31	kelch-like 31	3.96189	0.567497	-2.8035	0.00426779
21828	Thbs4	thrombospondin 4	1.79367	0.253331	-2.82382	0.0473817
15002	H2-Ob	histocompatibility 2, O region beta locus	9.53055	1.33499	-2.83573	0.00426779
12350	Car3	carbonic anhydrase 3	245.244	34.2332	-2.84075	0.0402247
207215	Fbxo40	F-box protein 40	3.85134	0.534231	-2.84982	0.00426779
17068	Ly6d	lymphocyte antigen 6 complex, locus D	17.8397	2.4537	-2.86206	0.00426779
21835	Thrsp	thyroid hormone responsive	21.1052	2.81765	-2.90503	0.00426779
18534	Pck1	phosphoenolpyruvate carboxykinase 1, cytosolic	37.6568	4.7861	-2.97599	0.00426779
66211	Rpl3l	ribosomal protein L3-like	5.32	0.662405	-3.00564	0.0473817
76757	Trdn	triadin	5.84101	0.720454	-3.01924	0.00426779
12869	Cox8b	cytochrome c oxidase subunit VIIIb	74.9014	9.23023	-3.02055	0.00426779
58200	Ppp1r1a	protein phosphatase 1, regulatory (inhibitor) subunit 1A	7.57562	0.92388	-3.03559	0.00426779
140781	Myh7	myosin, heavy polypeptide 7, cardiac muscle, beta	18.1997	2.19498	-3.05163	0.00426779
320502	Lmod3	leiomodin 3 (fetal)	2.15041	0.229731	-3.22659	0.0371343
241431	Xirp2	xin actin-binding repeat containing 2	19.765	1.97953	-3.31972	0.00426779
433766	Trim63	tripartite motif-containing 63	10.9368	1.05301	-3.37661	0.00426779
21384	Tbx15	T-box 15	1.71489	0.163504	-3.39072	0.0141249
242702	Myom3	myomesin family, member 3	5.68948	0.534582	-3.41181	0.00426779
18175	Nrap	nebulin-related anchoring protein	28.7997	2.68497	-3.42308	0.00426779
15985	Cd79b	CD79B antigen	27.942	2.60465	-3.42327	0.00426779
50874	Tmod4	tropomodulin 4	5.88193	0.543198	-3.43674	0.0252454
12483	Cd22	CD22 antigen	8.16402	0.741522	-3.46072	0.00426779
12290	Cacna1e	calcium channel, voltage-dependent, R type, alpha 1E subunit	1.23945	0.11196	-3.46864	0.00426779
78321	Ankrd23	ankyrin repeat domain 23	31.468	2.83886	-3.4705	0.00426779
228003	Klhl41	kelch-like 41	12.6532	1.07989	-3.55054	0.00426779
17901	Myl1	myosin, light polypeptide 1	87.8527	7.28152	-3.59277	0.00426779
12292	Cacna1s	calcium channel, voltage-dependent, L type, alpha 1S subunit	5.55213	0.433826	-3.67785	0.00426779
229665	Ampd1	adenosine monophosphate deaminase 1	2.83572	0.212417	-3.73875	0.0416003
11801	Cd5l	CD5 antigen-like	8.48348	0.62315	-3.767	0.00426779
229499	Fcrl1	Fc receptor-like 1	4.26053	0.28284	-3.91298	0.00426779
12145	Cxcr5	chemokine (C-X-C motif) receptor 5	4.71914	0.308159	-3.93678	0.00426779
12372	Casq1	calsequestrin 1	6.41205	0.395656	-4.01847	0.00426779
14128	Fcer2a	Fc receptor, IgE, low affinity II, alpha polypeptide	3.75693	0.216641	-4.11618	0.00426779
71886	2310002L09Rik	RIKEN cDNA 2310002L09 gene	6.58427	0.368112	-4.1608	0.00426779
233199	Mybpc2	myosin binding protein C, fast-type	9.6386	0.514059	-4.22882	0.00426779
12525	Cd8a	CD8 antigen, alpha chain	2.92136	0.143204	-4.3505	0.0112808
21955	Tnnt1	troponin T1, skeletal, slow	14.2641	0.6952	-4.35882	0.00426779
12715	Ckm	creatine kinase, muscle	149.958	6.44672	-4.53985	0.00426779
16069	Igj	immunoglobulin joining chain	21.216	0.699259	-4.92318	0.00426779
242248	Bank1	B cell scaffold protein with ankyrin repeats 1	10.3981	0.337921	-4.94349	0.00426779
17996	Neb	nebulin	33.8241	0.565043	-5.90355	0.00426779
20190	Ryr1	ryanodine receptor 1, skeletal muscle	10.5353	0.170584	-5.94861	0.00426779
21953	Tnni2	troponin I, skeletal, fast 2	188.564	2.64382	-6.15629	0.00426779
14955	H19	H19 fetal liver mRNA	12.1319	0.156572	-6.27584	0.0189723
21957	Tnnt3	troponin T3, skeletal, fast	287.519	2.62538	-6.77499	0.00426779
17907	Mylpf	myosin light chain, phosphorylatable, fast skeletal muscle	87.6284	0.786798	-6.79926	0.00426779
11459	Acta1	actin, alpha 1, skeletal muscle	280.161	1.00906	-8.1171	0.00426779
